# Supplementary material for: Polyoxazoline hydrogels fabricated by stereolithography
Source: Royal Society of Chemistry journal article supplement (doi:10.1039/d2bm00138a), 2022-01-01
Supplement: d2bm00138a1.pdf [file d2bm00138a1.pdf]

## Supporting information

### Polyoxazoline Hydrogels fabricated by Stereolithography

Thomas Brossier, Belkacem Tarek Benkhaled, Maxime Colpaert, Gael Volpi, Olivier Guillaume,  
Sébastien Blanquer, Vincent Lapinte

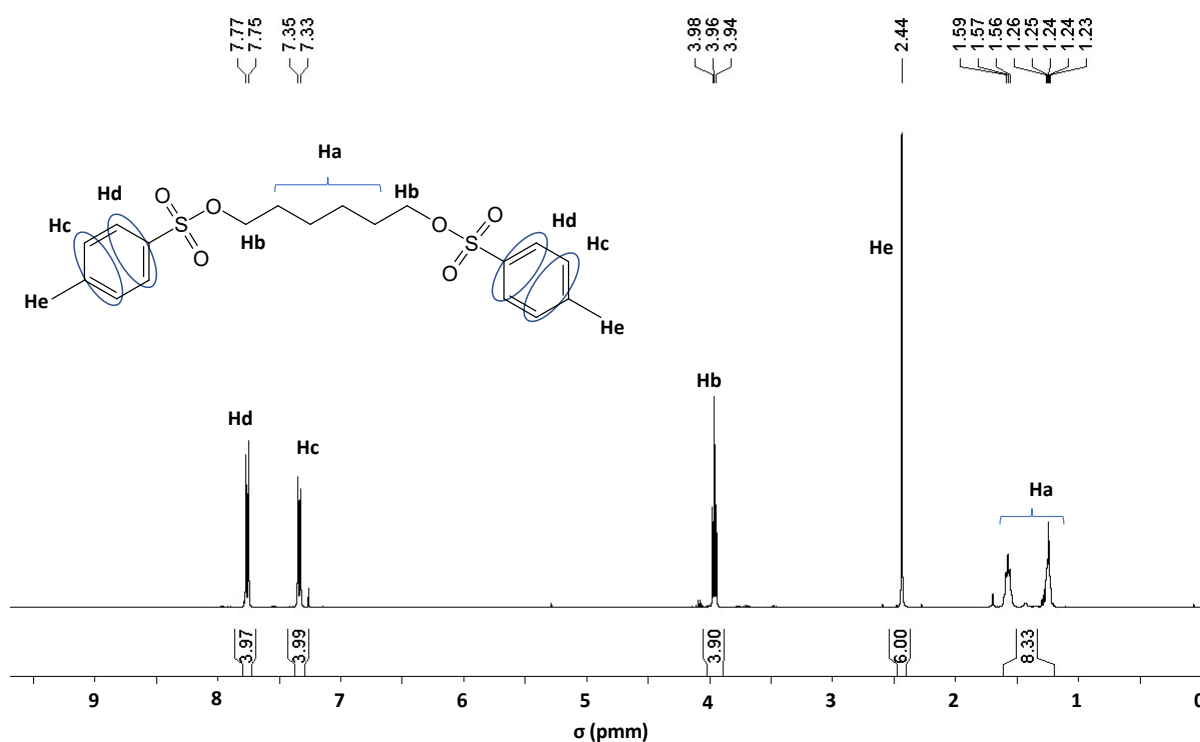

Figure S1. <sup>1</sup>H NMR spectrum of HDOTs (CDCl<sub>3</sub>)

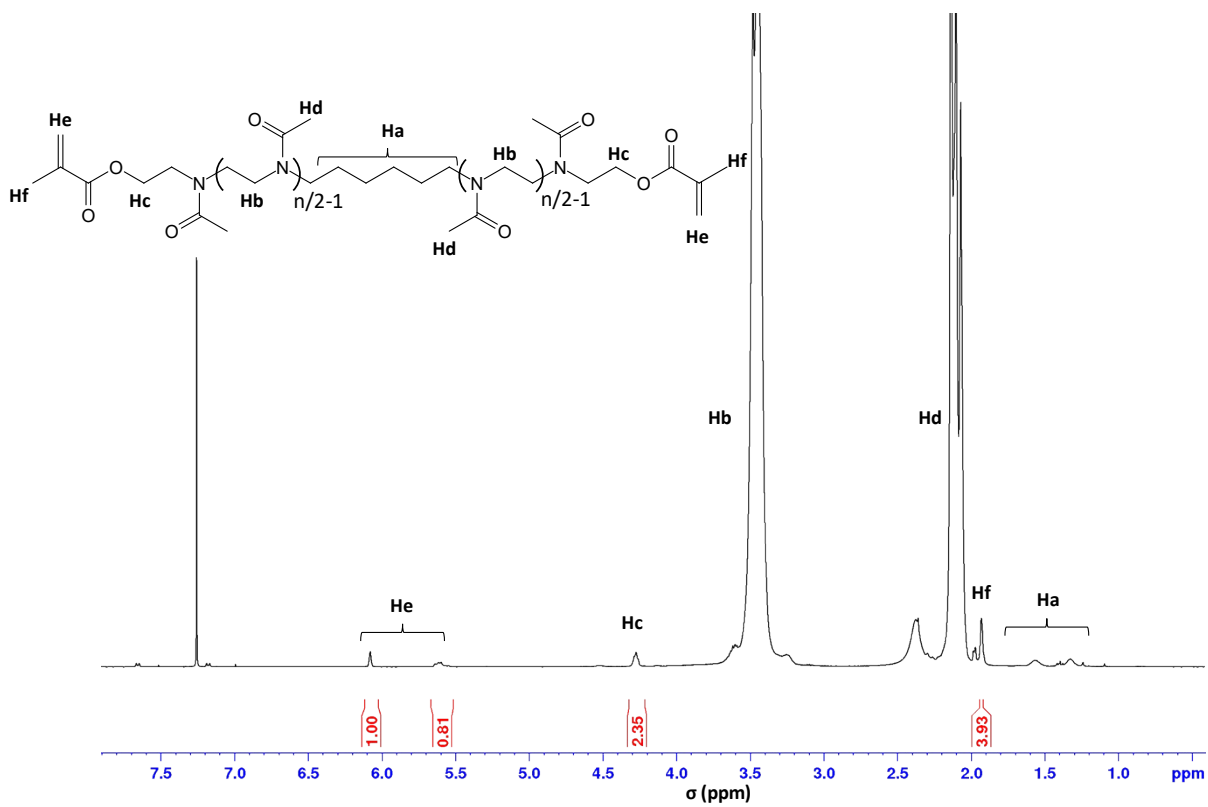

**Figure S2.**  $^1\text{H}$  NMR spectrum of bis-methacrylated poly(2-methyl-2-oxazoline) ( $\text{M}_2\text{POx}_n$ ) ( $\text{CDCl}_3$ )

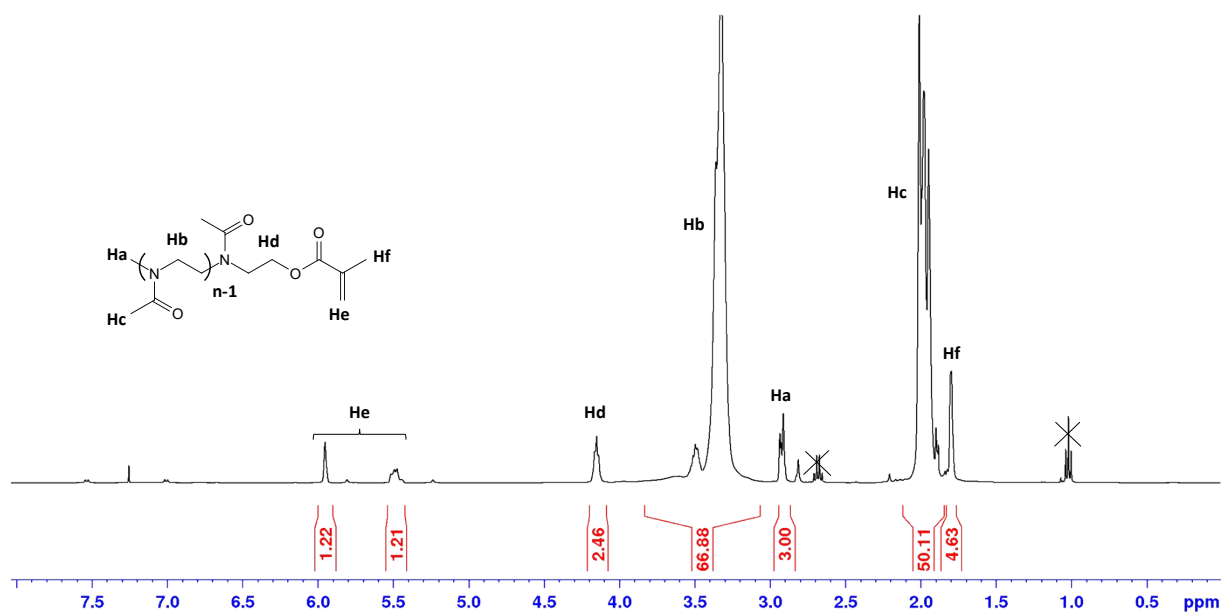

**Figure S3.** <sup>1</sup>H NMR spectrum of MPO<sub>x<sub>n</sub></sub> in CDCl<sub>3</sub>

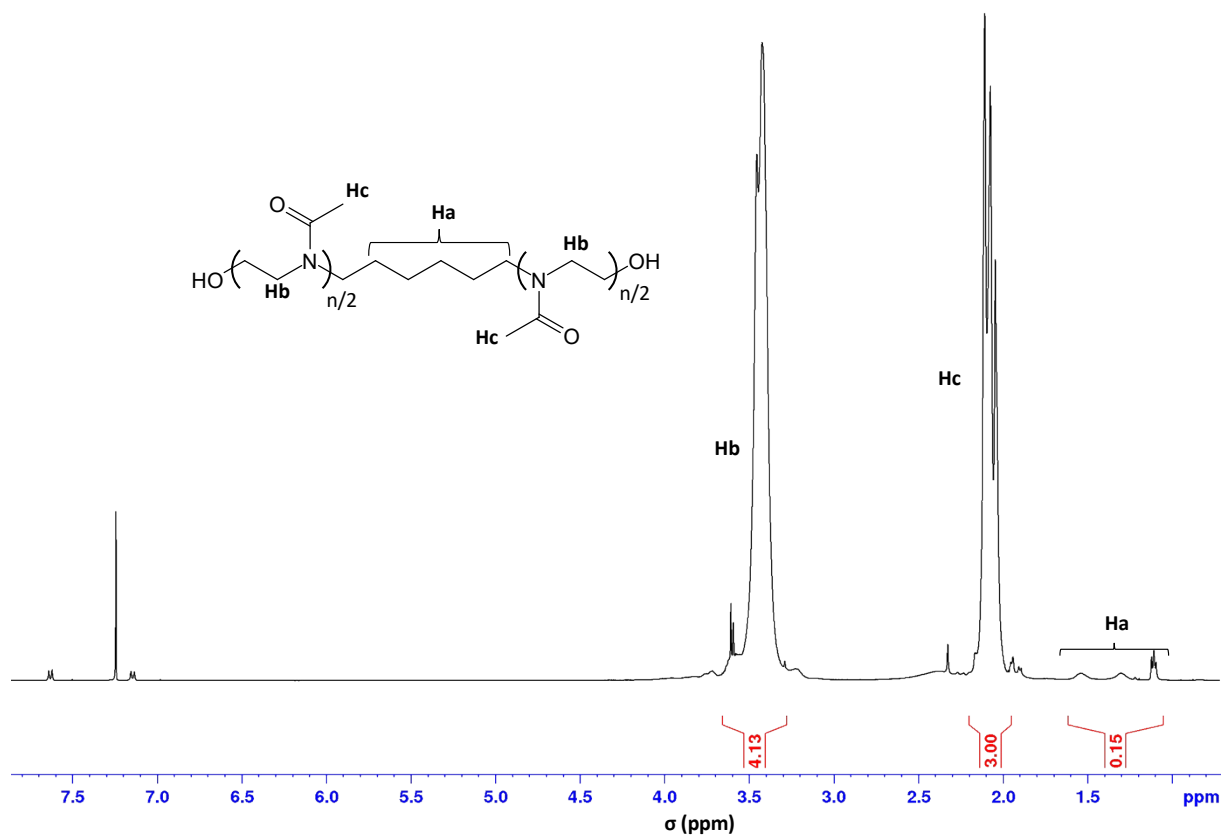

**Figure S4.**  $^1\text{H}$  NMR spectrum of poly(2-methyl-2-oxazoline)  $\text{PO}_{x_n}$

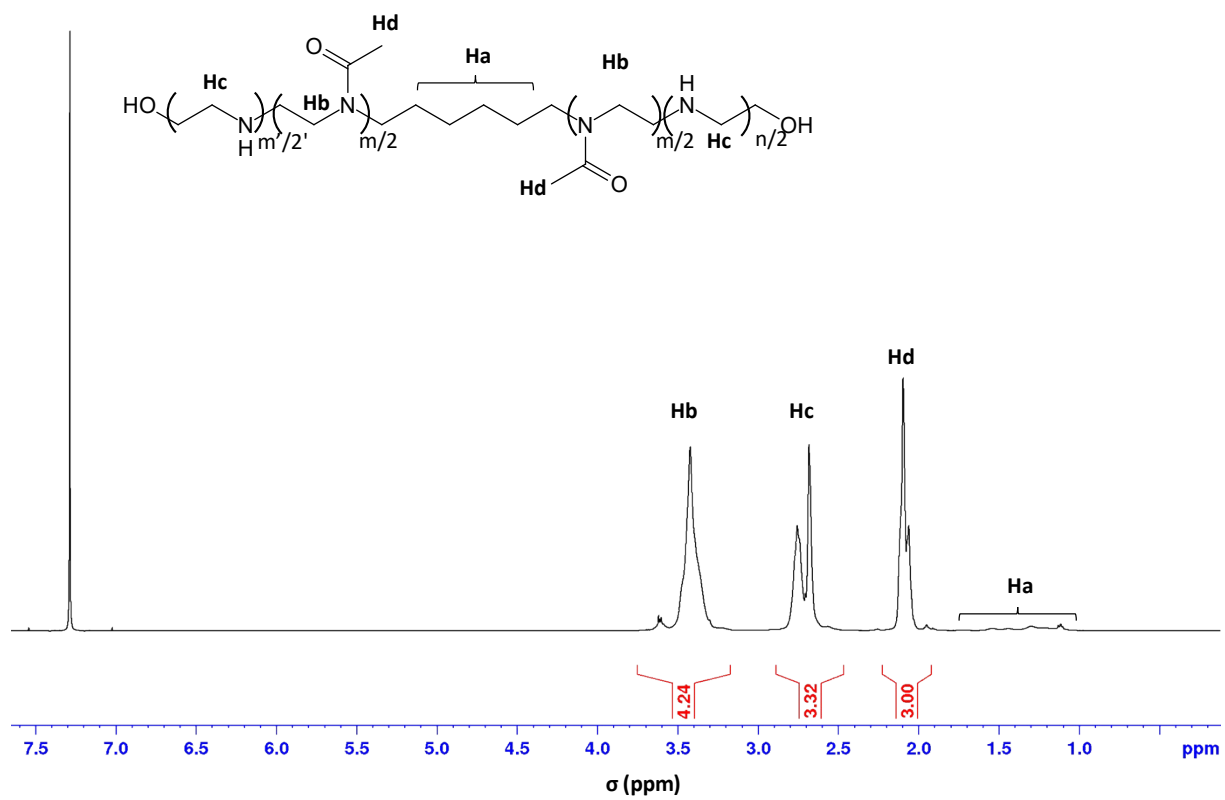

**Figure S5.**  $^1\text{H}$  NMR spectrum of  $\text{PO}_{x_m}\text{-PEI}_p$  in  $\text{CDCl}_3$

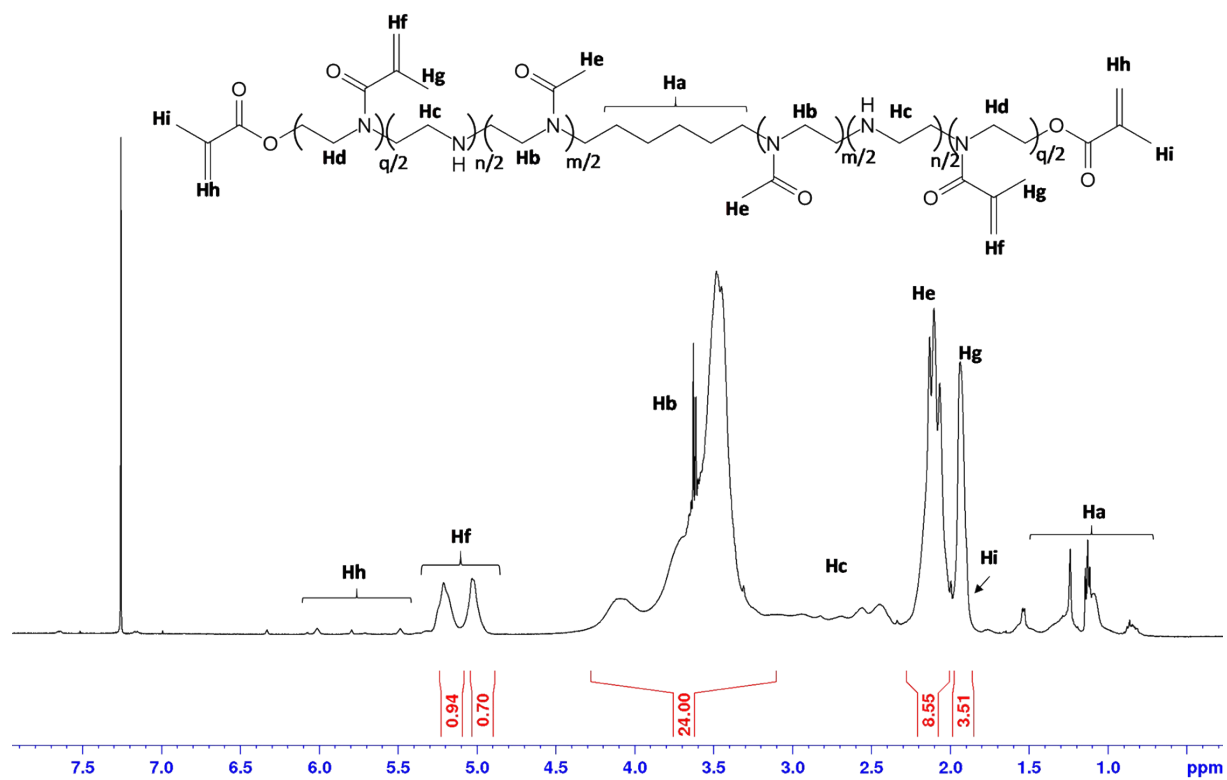

**Figure S6.**  $^1\text{H}$  NMR spectrum of  $\text{MA}_0\text{PO}_{x_m}\text{-PEI}_p$  in  $\text{CDCl}_3$

**Table S1.** Molecular weight of POx precursors determined by SEC in DMAc using PMMA standards.

| Name                                                 | $M_n$<br>(g/mol) | $\bar{D}$        |
|------------------------------------------------------|------------------|------------------|
| MA <sub>2</sub> POx <sub>10</sub>                    | 4 200            | 1.2 <sub>9</sub> |
| MA <sub>2</sub> POx <sub>75</sub>                    | 9 800            | 1.2 <sub>3</sub> |
| MA <sub>2</sub> POx <sub>120</sub>                   | 20 000           | 1.2 <sub>6</sub> |
| MA <sub>40</sub> POx <sub>66</sub> -PEI <sub>4</sub> | nd               | nd               |

nd: Not determined.

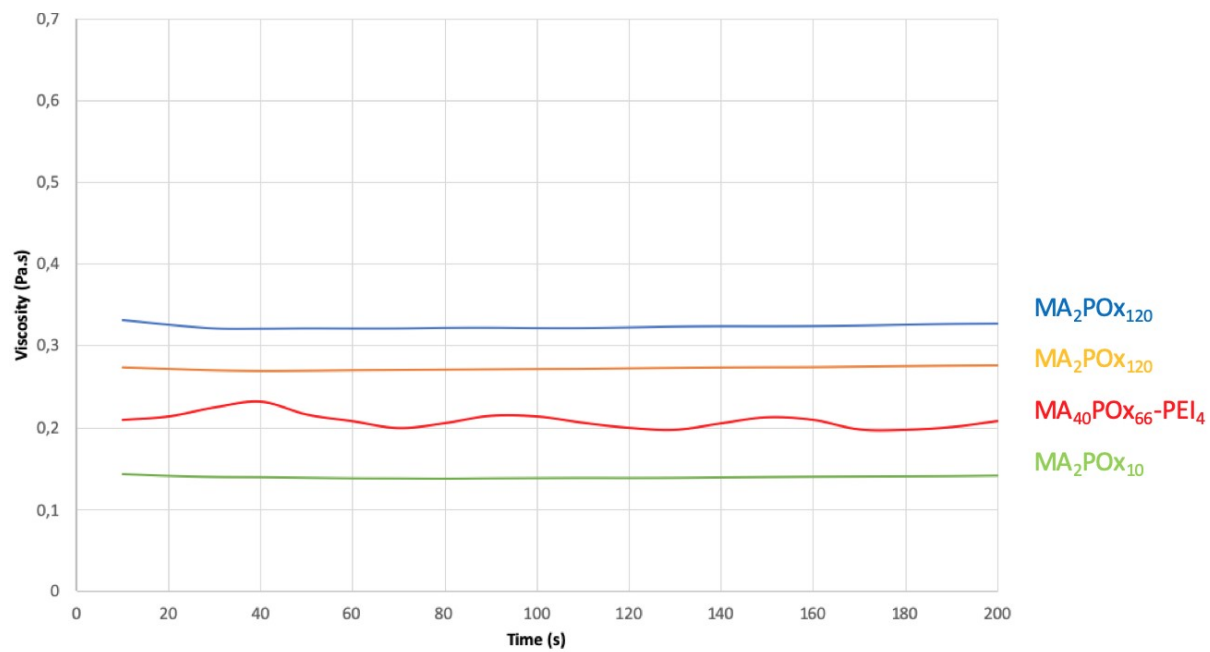

**Figure S7.** Viscosity versus time for formulations of POx precursors.



**Table S2.** Viscosity of the POx precursor solution for SLA.

| POx precursor                                        | wt/wt% | viscosity<br>(Pa.s) | Time of irradiation <sup>a</sup><br>(s/layer) |
|------------------------------------------------------|--------|---------------------|-----------------------------------------------|
| MA <sub>2</sub> PO <sub>x10</sub>                    | 40     | 0.15                | 20                                            |
| MA <sub>2</sub> PO <sub>x75</sub>                    | 45     | 0.21                | 30                                            |
| MA <sub>2</sub> PO <sub>x120</sub>                   | 50     | 0.32                | 35                                            |
| MA <sub>40</sub> PO <sub>x66</sub> -PEI <sub>4</sub> | 60     | 0.27                | 40                                            |

<sup>a</sup>: power of 20 mW/cm<sup>2</sup>.

**Table S3.** Characteristics of hydrogels based on MA<sub>2</sub>PO<sub>x10</sub> / MAPO<sub>x10</sub> blend.

| Formulation                                             | Q (%) | EWC (%) | E (MPa) | $\sigma_{\max}$ (MPa) | $\epsilon_{\max}$ (%) |
|---------------------------------------------------------|-------|---------|---------|-----------------------|-----------------------|
| MA <sub>2</sub> PO <sub>x10</sub> + MAPO <sub>x10</sub> | 759   | 88      | 0.159   | 0.063                 | 27.4                  |

**Table S4.** Network characteristic of hydrogels based on MA<sub>2</sub>POx<sub>n</sub> and MA<sub>2</sub>POx<sub>66</sub>PEI<sub>4</sub>.

| Name                                                 | w <sub>s</sub><br>(g) | w <sub>d</sub><br>(g) | Vs <sup>a</sup><br>(mL.mol <sup>-1</sup> ) | $\bar{M}_{cb}$<br>(kDa) | q <sup>c</sup> |
|------------------------------------------------------|-----------------------|-----------------------|--------------------------------------------|-------------------------|----------------|
| MA <sub>2</sub> POx <sub>10</sub>                    | 0.4727                | 0.1652                | 0.320                                      | 28.4                    | 28.4           |
| MA <sub>2</sub> POx <sub>75</sub>                    | 0.6540                | 0.1642                | 0.227                                      | 49.86                   | 49.86          |
| MA <sub>2</sub> POx <sub>120</sub>                   | 1.4457                | 0.2147                | 0.1327                                     | 139.1                   | 139.1          |
| MA <sub>40</sub> POx <sub>66</sub> -PEI <sub>4</sub> | 0.9037                | 0.1197                | 0.1181                                     | - <sup>d</sup>          | - <sup>d</sup> |

<sup>a</sup>: Calculated with equation 8. <sup>b</sup>: Calculated with equation 7. <sup>c</sup>: Calculated with equation 10. <sup>d</sup>: not determined.

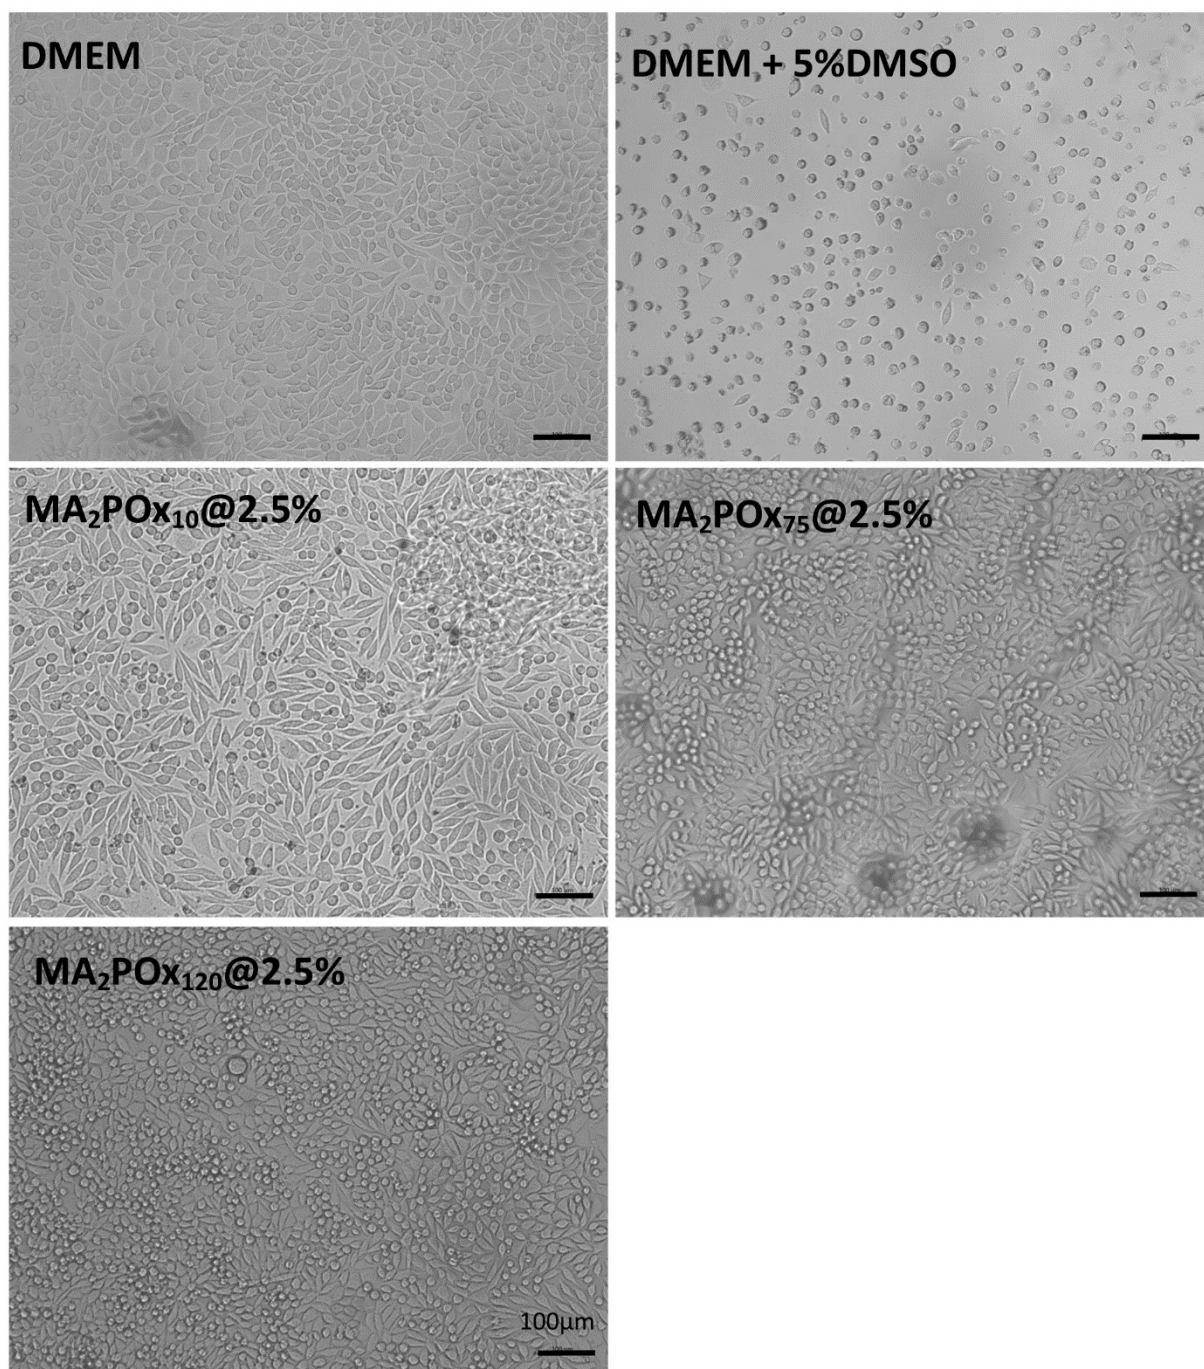

**Figure S8.** Morphology of the L929 incubated with 2.5% of the polymers after 48 hours of incubation.

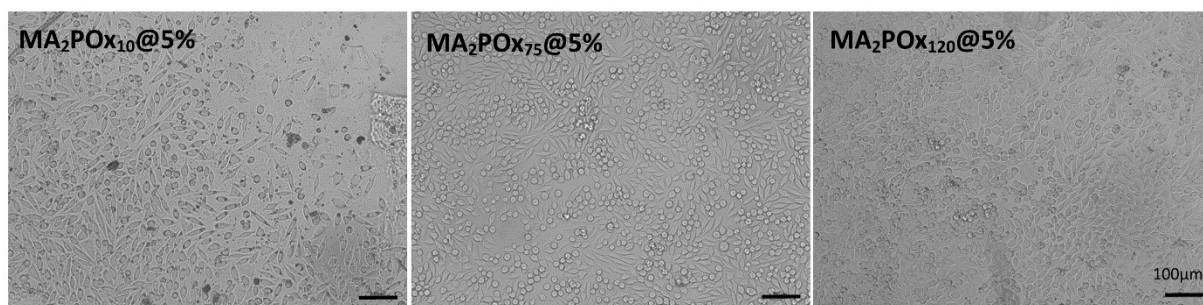

**Figure S9.** Morphology of the L929 incubated with 5% of the polymers after 48 hrs of incubation.
